# Supplementary material
Source: publisher figshare collection journal article supplement (https://karger.figshare.com/ndownloader/files/30458991)
Supplement: Supplementary file 1 [file 30458991]

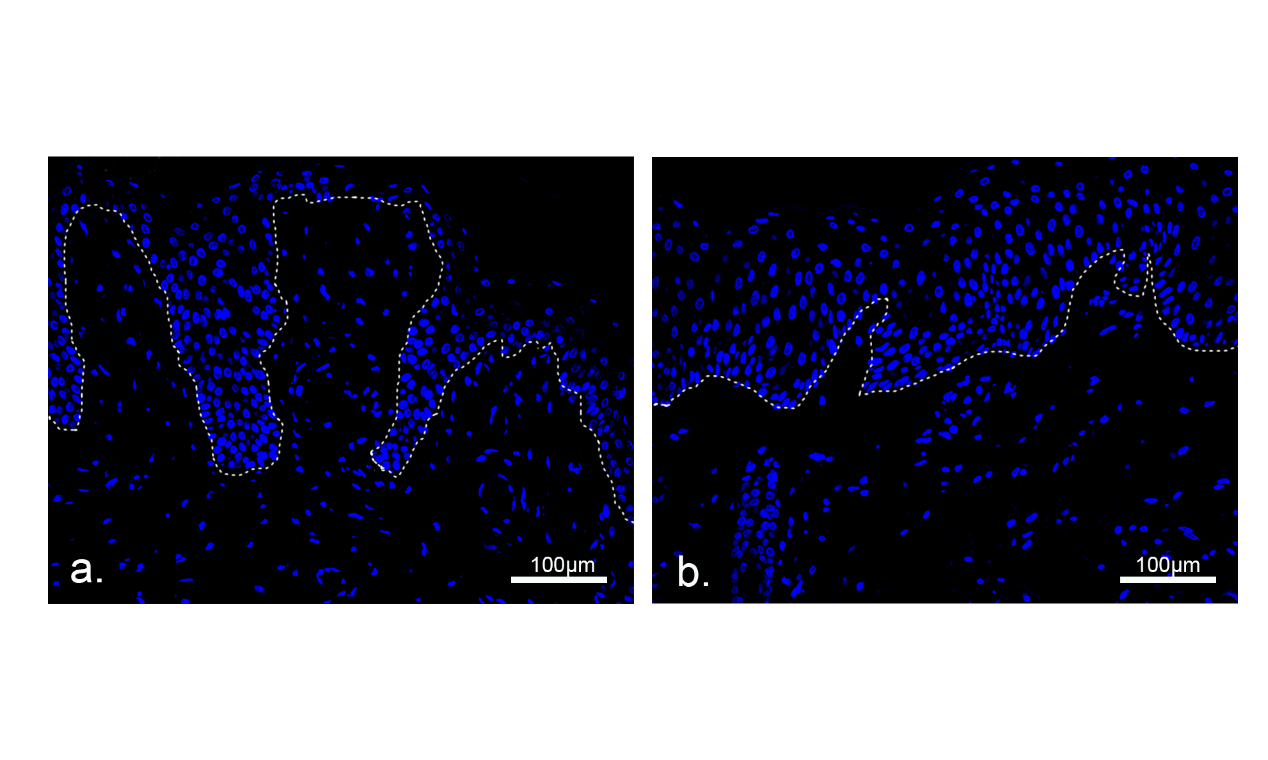


**Fig. 5.** No similar cloud-like blue material without nuclei in the dermal papillae. (a). Lipoid proteinosis. (b). Porphyria. (The white dashed line marks the basal layer) (DAPI staining, magnification×200).
